# Supplementary material
Source: PubMed Central journal article supplement (PMC5470891)
Supplement: jciinsight-2-91810-s001.pdf [file jciinsight-2-91810-s001.pdf]

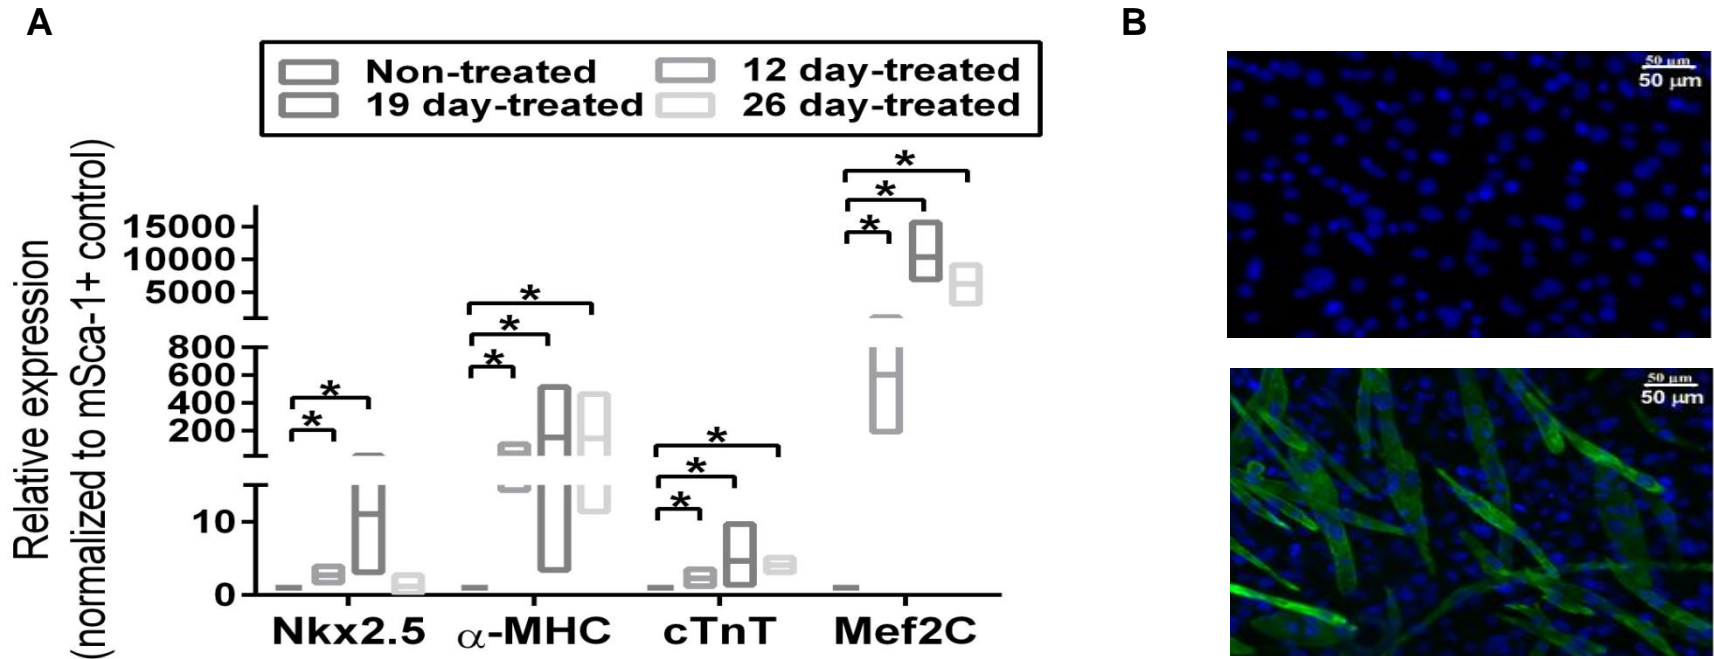

**Supplemental Figure 1. Differentiation of Sca1+ cardiac progenitor cells (CPC) by 5-azacytidine (AZA)/TGFbeta.** CPC were treated with AZA (5  $\mu$ M) and TGFbeta (1 ng/ml) for 12-26 days in culture. Relative gene expression indicative of cardiac myocyte lineage differentiation was measured by qRT-PCR and normalized to untreated controls. (A) Relative expression of mRNA for cardiac transcription factors (Nkx2.5 and Mef2C), and structural proteins (cardiac Troponin T, cTnT; alpha-Myosin Heavy Chain, alpha-MHC); n=3 different preparations; bounds of boxes are minimal and maximal values; internal line at mean value; \*: p<0.016 vs non-treated cells by Mann-Whitney test after correction for multiple comparisons. (B) Representative picture of CPC differentiating into cardiac myocytes upon treatment with AZA/TGFbeta (lower). Immunocytochemistry was performed using antibody against cTnT (green). DAPI staining is in blue. No differentiation is observed in control CPC in absence of treatment (upper).

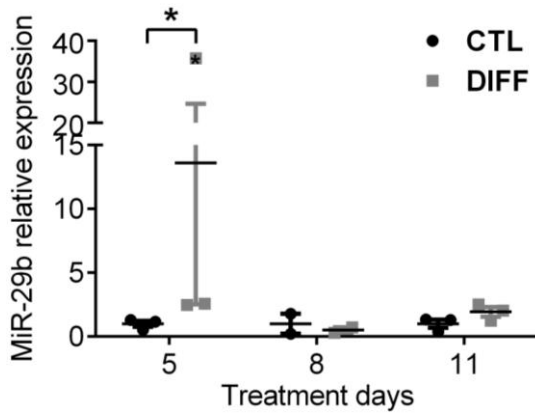

Supplemental Figure 2 . Time-dependent expression of miR-29b in CPCs during differentiation. Relative gene expression was measured using qRT-PCR and normalized to 5S. \*  $p < 0.05$  vs. CTL,  $n=3$  experiments; Mann-Whitney test.

| Gene symbol      | Gene description                                    | Sequences (5' to 3')           |
|------------------|-----------------------------------------------------|--------------------------------|
| axin2            | Axin2                                               | F:CGGATTCAGGTCCTTCAAGA         |
|                  |                                                     | R:TGGATAACTCGCTGTCGTTG         |
| Wnt4             | wingless-type MMTV integration sit family, member 4 | F:AGG AAG GCC ATC TTG ACA CA   |
|                  |                                                     | R:GCA CCG TCA AAC TTC TCC TT   |
| Snai2            | snail family zinc finger 2                          | F:CTA CAG CGA ACT GGA CAC ACA  |
|                  |                                                     | R:GGG TAA AGG AGA GTG GAG TGG  |
| Lef1             | lymphoid enhancer binding factor 1                  | F: GTC CCT TTC TCC ACC CAT C   |
|                  |                                                     | R: AAG TGC TCG TCG CTG TAG G   |
| Wif-1            | Wnt inhibitory factor 1                             | F: CCC ACG GAA CCT GCC ACG AA  |
|                  |                                                     | R: CTC GGG GCA TGC ATG AGG CTG |
| HBP1             | high mobility group box transcription factor 1      | F: ACT CAC AAG GGC TAT GGG TCT |
|                  |                                                     | R: GCT TGG ATA AAA TGA CGA CCA |
| Nkx2.5           | NK2 homeobox 5                                      | F: ACC CGG GAG CCT ACG GTG AC  |
|                  |                                                     | R: GCG CCA TCC GTC TCG GCT TT  |
| Myh6 (alpha-MHC) | myosin, heavy polypeptide 6, cardiac muscle, alpha  | F: GAT GGC ACA GAA GAT GCT GA  |
|                  |                                                     | R: CTG CCC CTT GGT GAC ATA CT  |
| Tnnt2 (cTnT)     | troponin T2, cardiac                                | F: GTT GGT CCT GAT GAA GAA G   |
|                  |                                                     | R: GAG TCT GTA GCT CAT TCA G   |
| Mef2C            | myocyte enhancer factor 2C                          | F: CCG ATG CAG ACG ATT CAG TAG |
|                  |                                                     | R: GTG TCA CAC CAG GAG ACA TAC |
| GAPDH            | glyceraldehyde-3-phosphate dehydrogenase            | F:ACCCCAGCAAGGACACTGAGCAAG     |
|                  |                                                     | R:TGGGGGTCTGGGATGGAAATTGTG     |

Table S1. Sense and anti-sense primers to amplify cDNA sequences of interest by RT-qPCR in *Mus musculus* samples.

| DIANA-microT      | TargetScanMouse | MicroCosm Targets | PicTar         | miRanda        |
|-------------------|-----------------|-------------------|----------------|----------------|
| mmu-miR-5101      | miR-29abcd      | mmu-miR-29c       | hsa-miR-328    | mmu-miR-708    |
| mmu-miR-29c-3p    | miR-138         | mmu-miR-719       | hsa-miR-30e-5p | mmu-miR-28     |
| mmu-miR-29a-3p    | miR-138ab       |                   | hsa-miR-30d    | mmu-miR-374    |
| mmu-miR-1192      | miR-101         |                   | hsa-miR-194    | mmu-miR-361    |
| mmu-miR-495-3p    | miR-101ab       |                   | hsa-miR-101    | mmu-miR-26b    |
| mmu-miR-29b-3p    | miR-30abcdef    |                   | hsa-miR-29a    | mmu-miR-26a    |
| mmu-miR-1231-5p   | miR-330abe-5p   |                   | hsa-miR-30b    | mmu-miR-1192   |
| mmu-miR-667-5p    | miR-384-5p      |                   | hsa-miR-30c    | mmu-miR-495    |
| mmu-miR-129-5p    | miR-218         |                   | hsa-miR-30a-5p | mmu-miR-384-5p |
| mmu-miR-384-5p    | miR-218a        |                   | hsa-miR-29c    | mmu-miR-30b    |
| mmu-miR-26a-5p    | miR-26ab        |                   | hsa-miR-29b    | mmu-miR-30c    |
| mmu-miR-26b-5p    | miR-1297        |                   | hsa-let-7d     | mmu-miR-30a    |
| mmu-miR-669b-5p   | miR-4467        |                   |                | mmu-miR-30d    |
| mmu-miR-3074-2-3p | miR-137         |                   |                | mmu-miR-30e    |
| mmu-miR-5102      | miR-137ab       |                   |                | mmu-miR-29a    |
| mmu-miR-30e-5p    |                 |                   |                | mmu-miR-29b    |
| mmu-miR-543-3p    |                 |                   |                | mmu-miR-29c    |
| mmu-miR-30b-5p    |                 |                   |                | mmu-miR-543    |
| mmu-miR-450b-5p   |                 |                   |                | mmu-miR-194    |
| mmu-miR-30d-5p    |                 |                   |                | mmu-miR-132    |
| mmu-miR-30c-5p    |                 |                   |                | mmu-miR-181a   |
| mmu-miR-30a-5p    |                 |                   |                | mmu-miR-181b   |
| mmu-miR-194-5p    |                 |                   |                | mmu-miR-181d   |
| mmu-miR-671-5p    |                 |                   |                | mmu-miR-181c   |
| mmu-miR-3070b-3p  |                 |                   |                | mmu-miR-212    |
| mmu-miR-452-5p    |                 |                   |                |                |
| mmu-miR-325-3p    |                 |                   |                |                |
| mmu-miR-3099-3p   |                 |                   |                |                |
| mmu-miR-708-5p    |                 |                   |                |                |
| mmu-miR-3070a-3p  |                 |                   |                |                |

Table S2. Predicted miRNAs targeting Dnmt3a in *Mus musculus*. Displayed miRNAs from DIANA-microT-CDS analysis are ordered by miTG score, superior to 0.9. TargetScanMouse 6.2 search was performed on conserved sites for miRNA families broadly conserved among vertebrates. Targeted sites were sorted by aggregate  $P_{CT}$  superior to 0.9. PicTar search was performed on target predictions for all human microRNAs based on conservation in mammals (human, chimp, mouse, rat and dog). Displayed miRNAs are characterized by a *Mus musculus* probability superior to 0.9. Displayed miRNAs from MiRanda analysis were ordered by sum of mirSVR scores.
